# Supplementary material for: Do perfluoroarene⋯arene and C–H⋯F interactions make a difference to the structures of 4,2′:6′,4′′-terpyridine-based coordination polymers?
Source: Royal Society of Chemistry journal article supplement (doi:10.1039/c3ce41384e), 2013-01-01
Supplement: c3ce41384e.pdf [file c3ce41384e.pdf]

ESI to accompany

## Do perfluorarene..arene and C–H...F interactions make a difference to 4,2':6',4''-terpyridine-based coordination polymers?

Edwin C. Constable,<sup>a</sup> Catherine E. Housecroft<sup>a\*</sup> Srboljub Vujovic,<sup>a</sup> Jennifer A. Zampese,<sup>a</sup> Aurélien Crochet<sup>b</sup> and Stuart R. Batten<sup>c</sup>

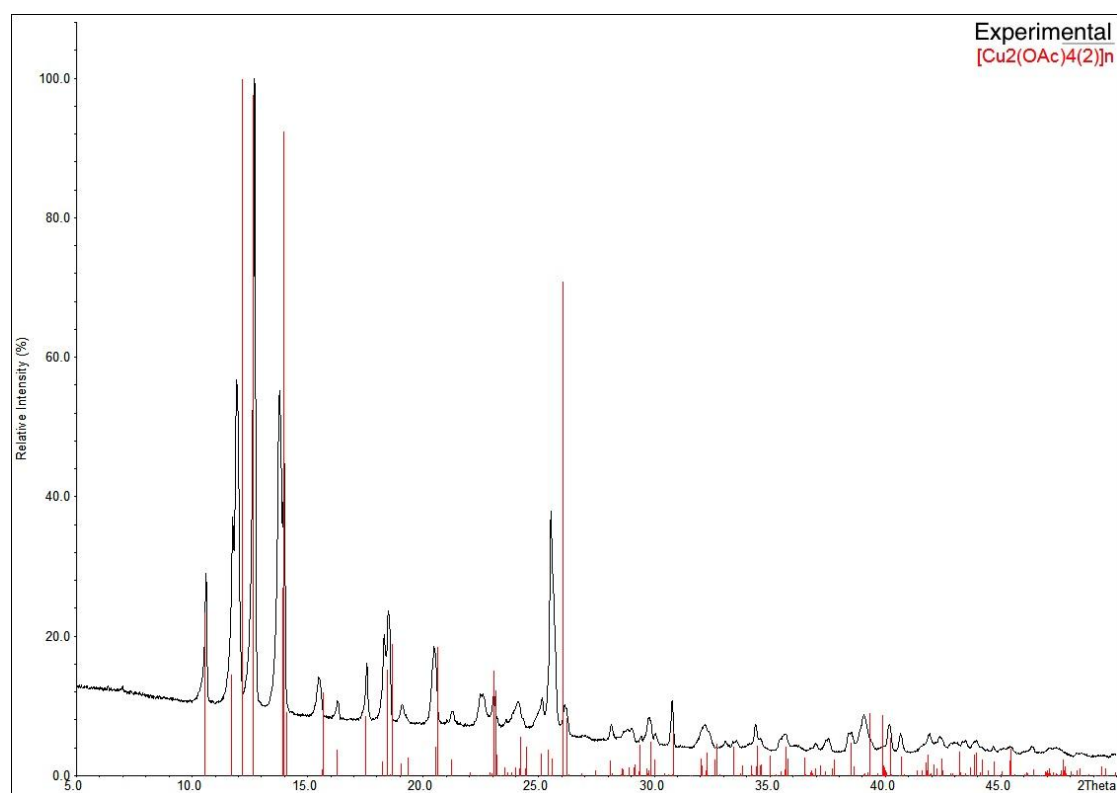

Fig. S1. Experimental powder diffraction pattern for the bulk sample of  $[\text{Cu}_2(\mu\text{-OAc})_4(\mathbf{2})]_n$ , compared to the calculated powder pattern from single crystal data of  $[\text{Cu}_2(\mu\text{-OAc})_4(\mathbf{2})]_n$ .

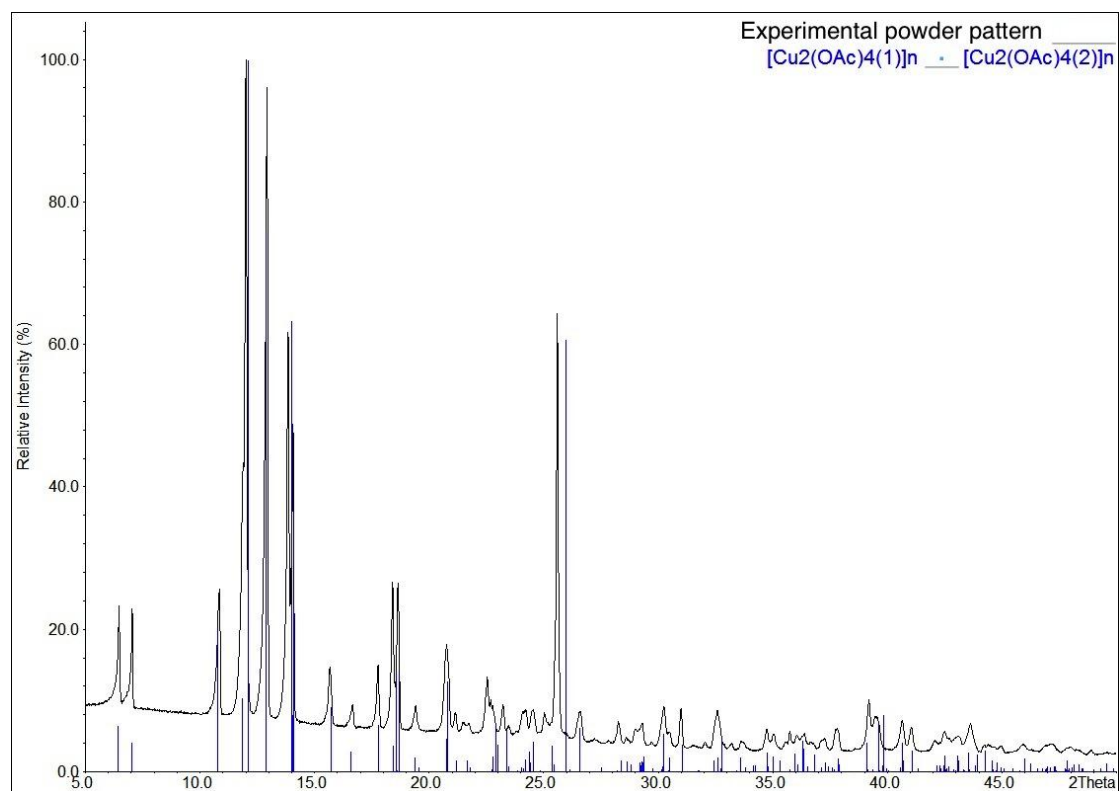

Fig. S2. Experimental powder diffraction pattern for the bulk sample of  $[\text{Cu}_2(\mu\text{-OAc})_4(\mathbf{1})]_n \cdot [\text{Cu}_2(\mu\text{-OAc})_4(\mathbf{2})]_n$ , compared to the calculated powder pattern from single crystal data of  $[\text{Cu}_2(\mu\text{-OAc})_4(\mathbf{1})]_n \cdot [\text{Cu}_2(\mu\text{-OAc})_4(\mathbf{2})]_n$ .

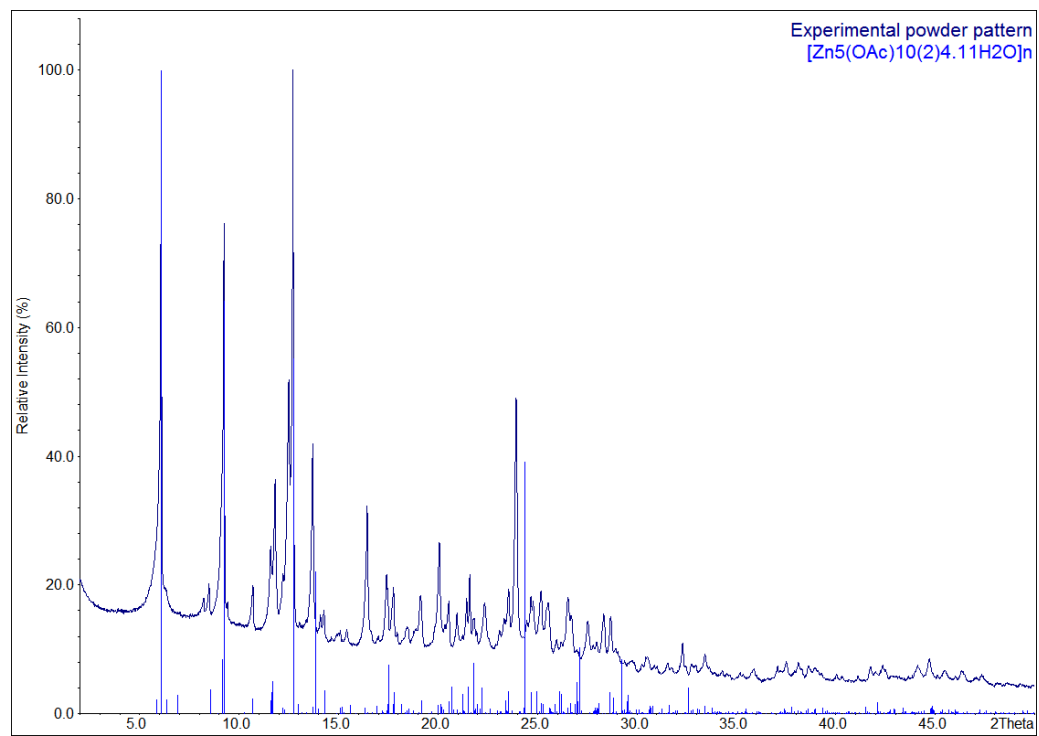

Fig. S3(a)

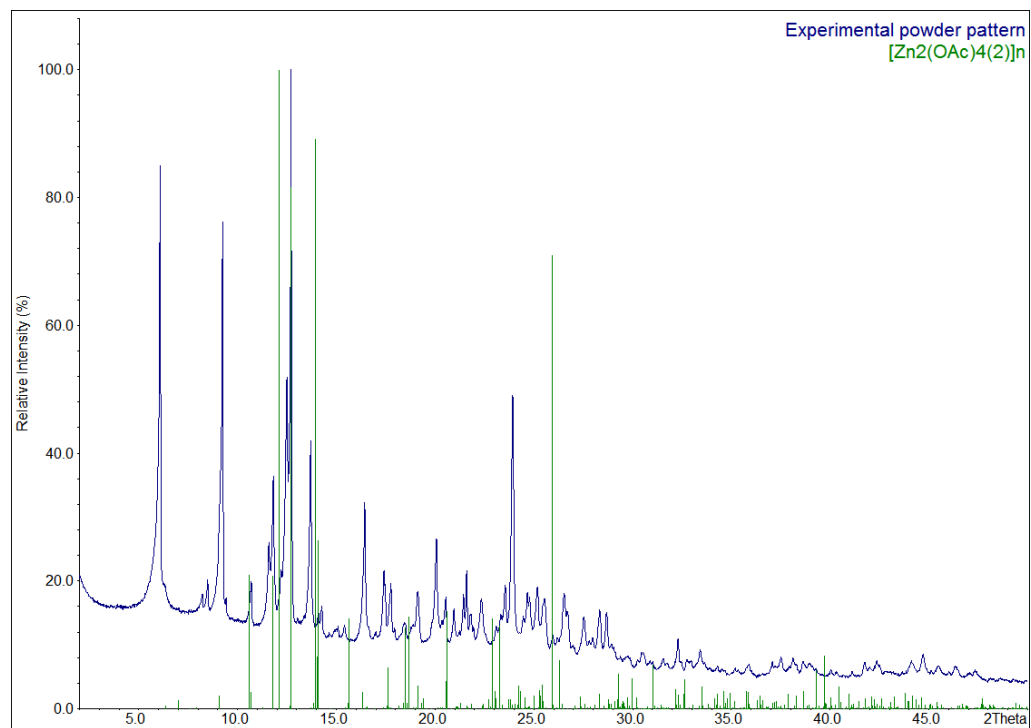

Fig. S3(b)

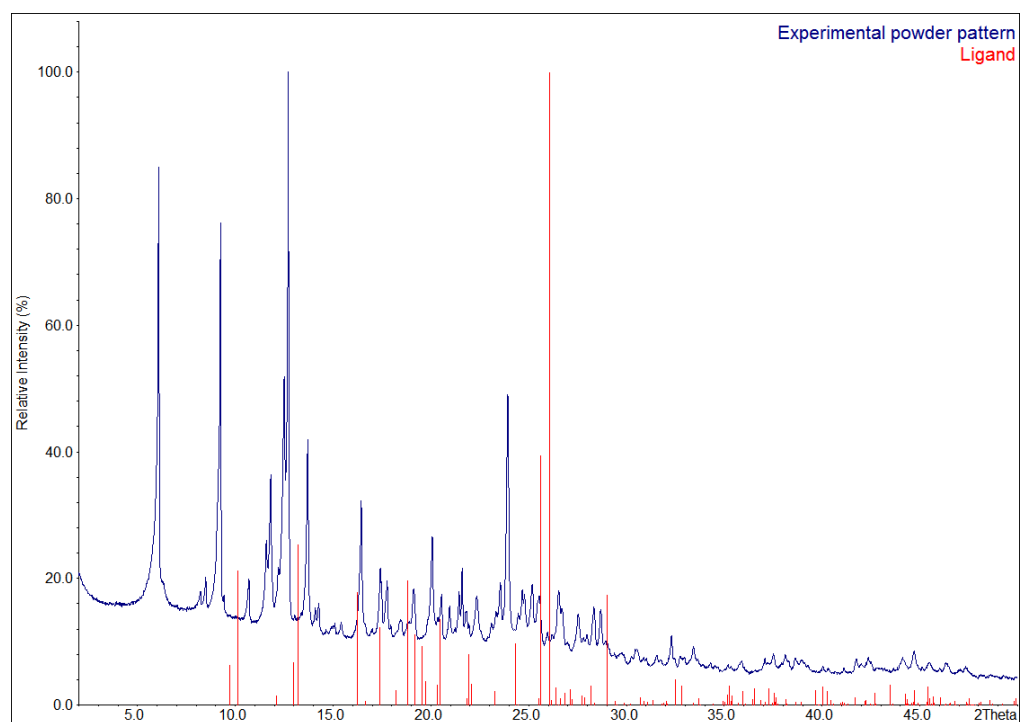

Fig. S3(c)

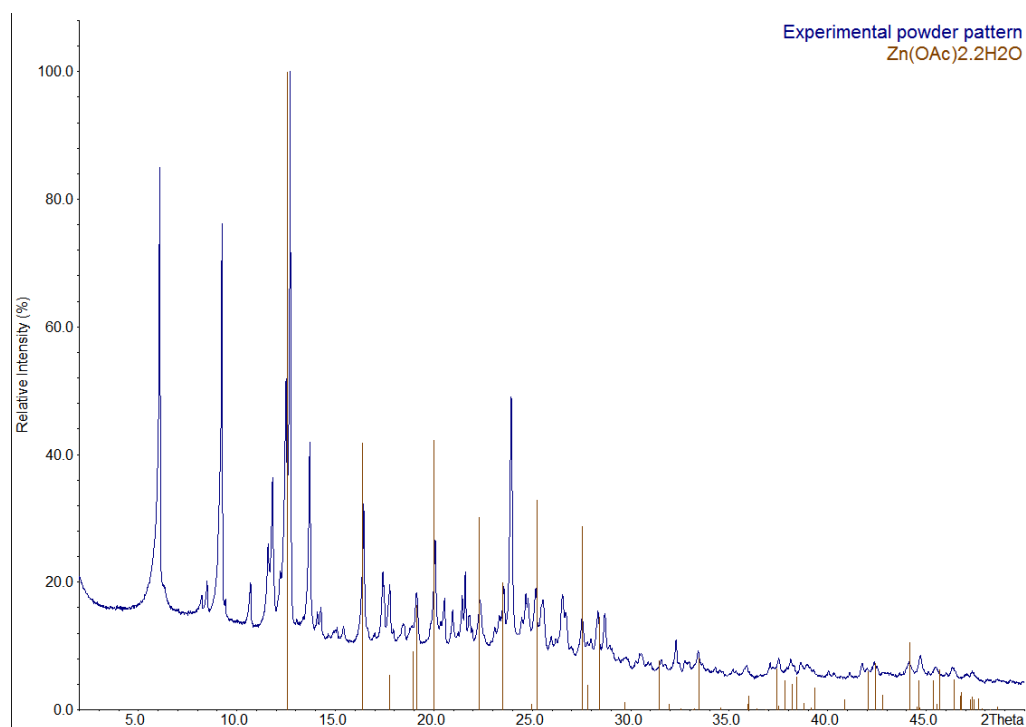

Fig. S3(d)

Fig. S3. Experimental powder diffraction pattern for the bulk sample of the reaction of  $\text{Zn}(\text{OAc})_2 \cdot 2\text{H}_2\text{O}$  and **2**, compared to the calculated powder pattern from single crystal data of (a)  $[\text{Zn}_5(\text{OAc})_{10}(\mathbf{2})_4 \cdot 11\text{H}_2\text{O}]_n$ , (b)  $[\text{Zn}_2(\mu\text{-OAc})_4(\mathbf{2})]_n$ , (c) ligand **2**, and (d)  $\text{Zn}(\text{OAc})_2 \cdot 2\text{H}_2\text{O}$ .
